# Supplementary material for: Greenness Assessment and Synthesis for the Bio-Based Production of the Solvent 2,2,5,5-Tetramethyloxolane (TMO)
Source: MDPI journal article supplement (doi:10.3390/suschem2030023), 2021-07-28
Supplement: s1 [file s1]

Archive with 1 entries (1 files):
- suschem-1282526-supplementary.pdf
