# Supplementary material for: Greenness Assessment and Synthesis for the Bio-Based Production of the Solvent 2,2,5,5-Tetramethyloxolane (TMO)
Source: MDPI journal article supplement (doi:10.3390/suschem2030023), 2021-07-28
Supplement: s1 [file s1 › suschem-1282526-supplementary.pdf]

Electronic supplementary information

## **Greenness Assessment and Synthesis for the Bio-Based Production of the Solvent 2,2,5,5-Tetramethyloxolane (TMO)**

**Fergal P. Byrne <sup>1</sup>, James H. Clark <sup>1</sup>, Carlo Angelici <sup>2</sup>, Ed de Jong <sup>2</sup> and Thomas J. Farmer <sup>1,\*</sup>**

<sup>1</sup> Green Chemistry Centre of Excellence, Department of Chemistry, University of York, Heslington, York YO10 5DD, UK; fergal.byrne@york.ac.uk (F.P.B.); james.clark@york.ac.uk (J.H.C.)

<sup>2</sup> Avantium, Zekeringstraat 29, 1014 BV Amsterdam, The Netherlands; carlo.angelici@avantium.com (C.A.); ed.dejong@avantium.com (E.d.J.)

\* Correspondence: thomas.farmer@york.ac.uk; Tel.: +44-(0)-1904-324479

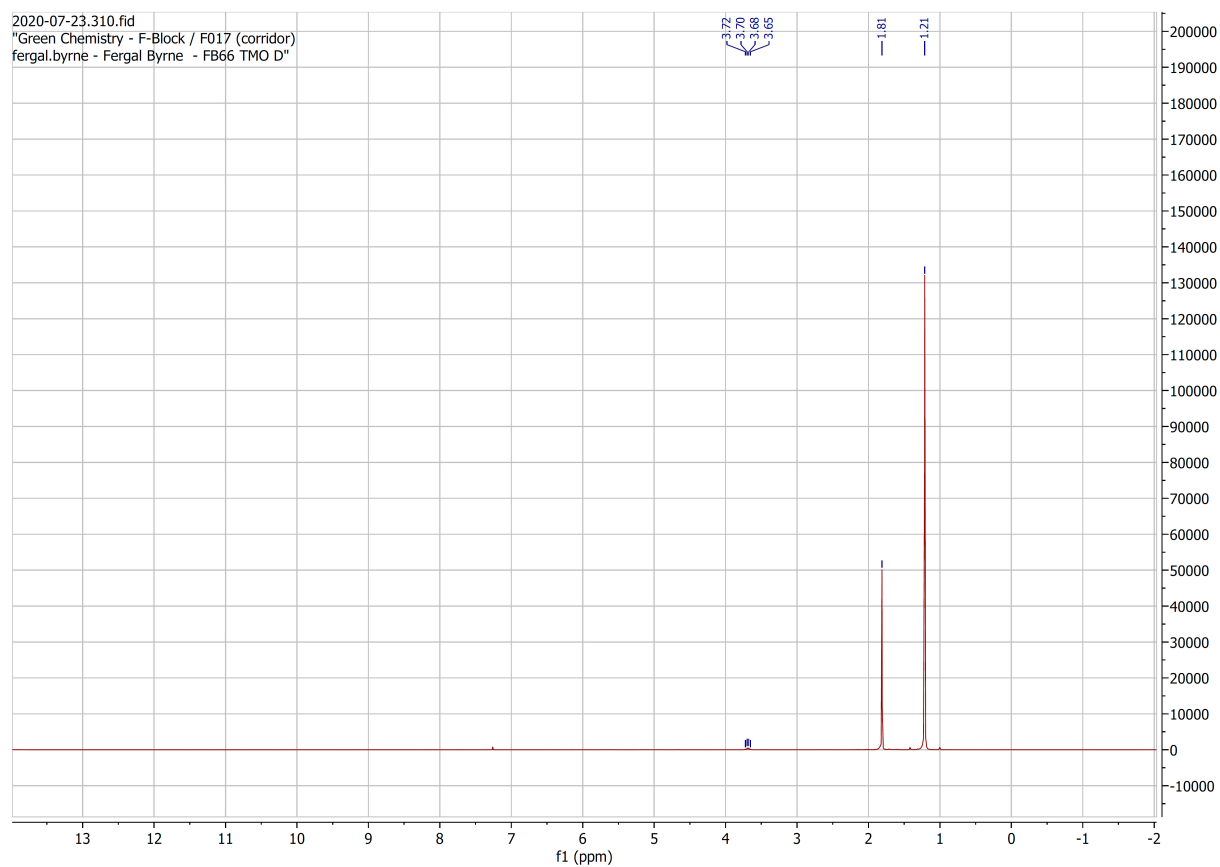

Figure S1.  $^1\text{H}$  NMR spectrum of partially bio-based 2,2,5,5-tetramethyloxolane (TMO) produced by Route 1.  $\text{CDCl}_3$  solvent.

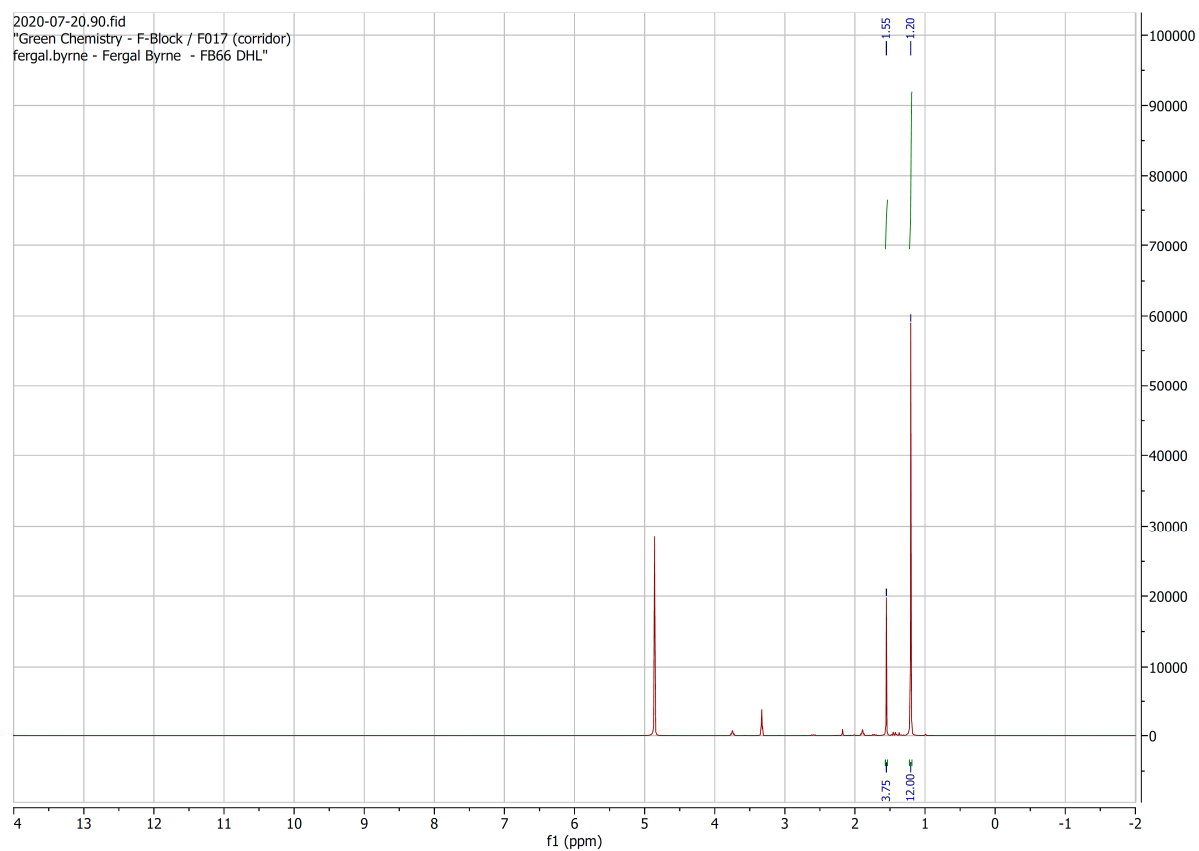

Figure S2.  $^1\text{H}$  NMR spectrum of partially bio-based 2,5-dimethyl-2,5-hexandiol (DHL) produced by Route 1, d-MeOD solvent.

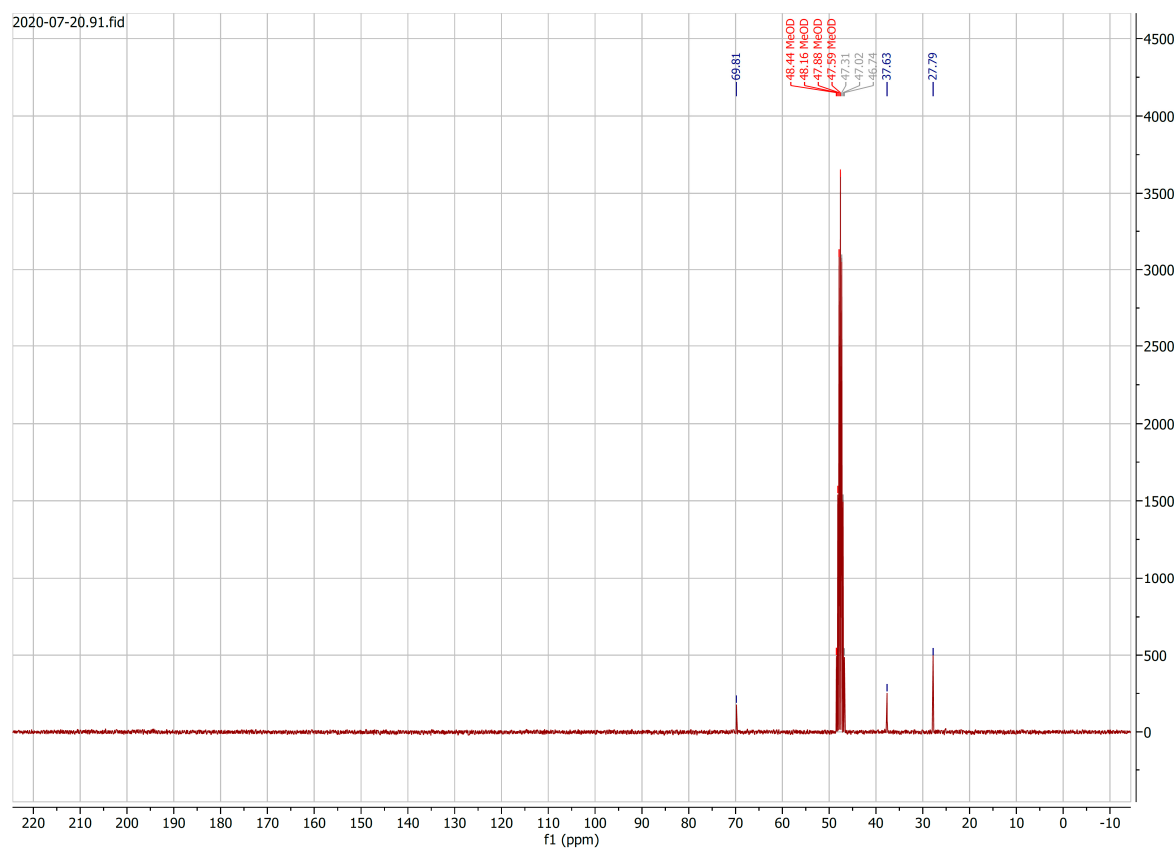

Figure S3.  $^{13}\text{C}$  NMR spectrum of partially bio-based 2,5-dimethyl-2,5-hexandiol (DHL) produced by Route 1, d-MeOD solvent.

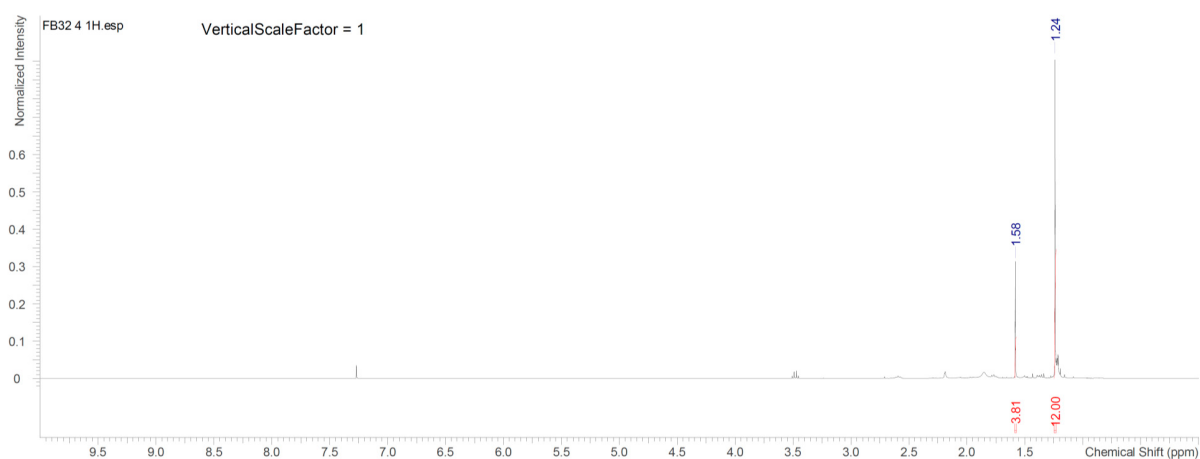

Figure S4.  $^1\text{H}$  NMR of 2,5-dimethyl-2,5-hexanediol as produced by Route 2.  $\text{CDCl}_3$  solvent.

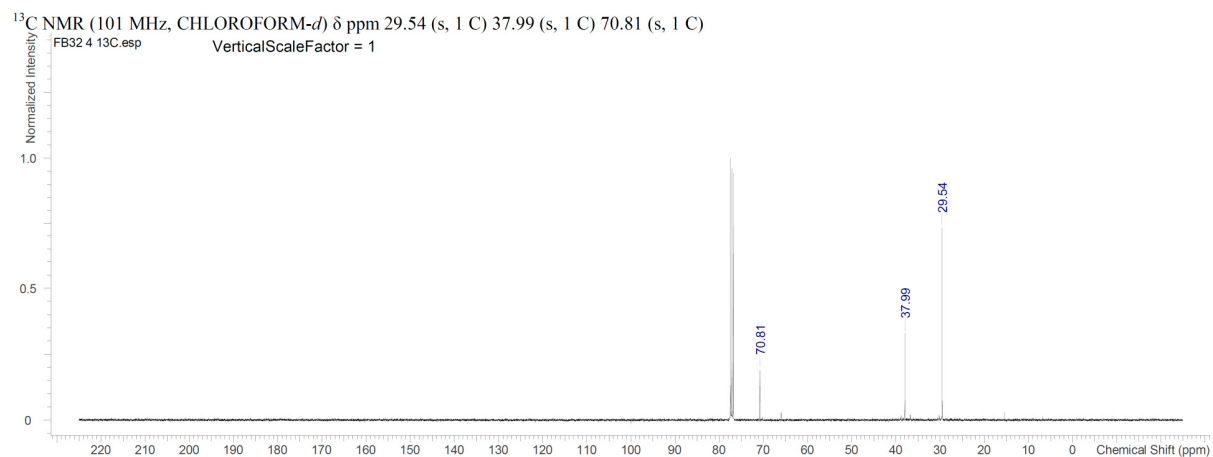

Figure S5. <sup>13</sup>C NMR of 2,5-dimethyl-2,5-hexanediol as produced by Route 2, CDCl<sub>3</sub> solvent.

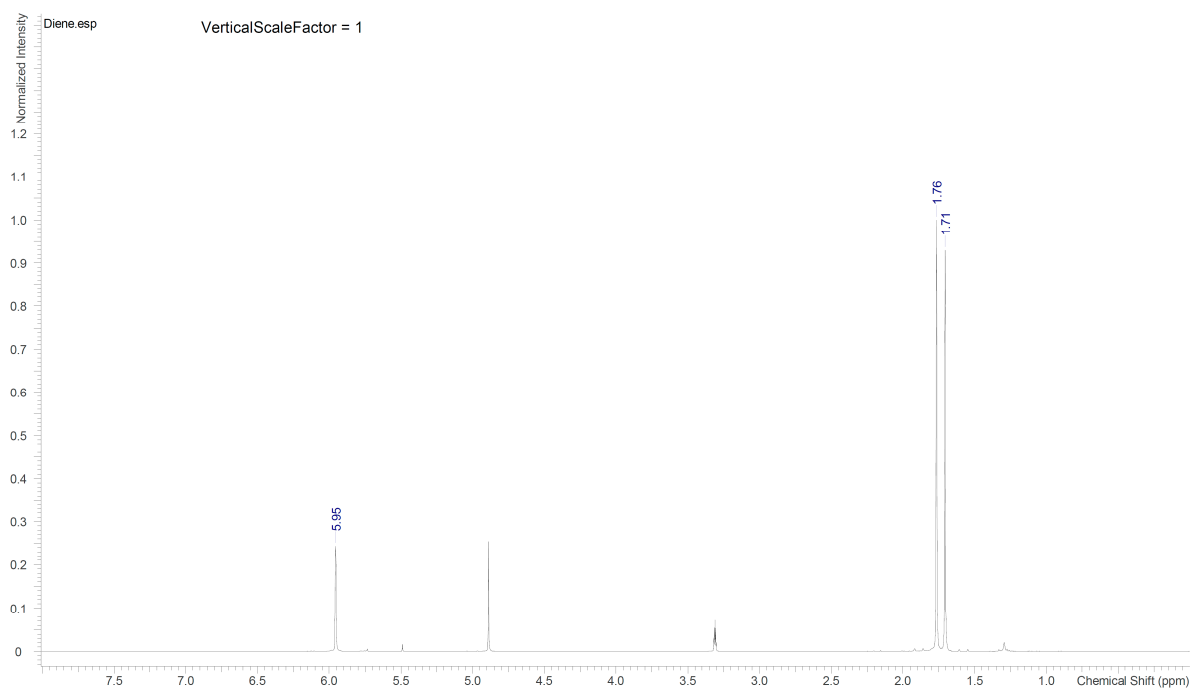

Figure S6. <sup>1</sup>H NMR spectrum of 2,5-dimethylhexane-2,4-diene, d-MeOD solvent.

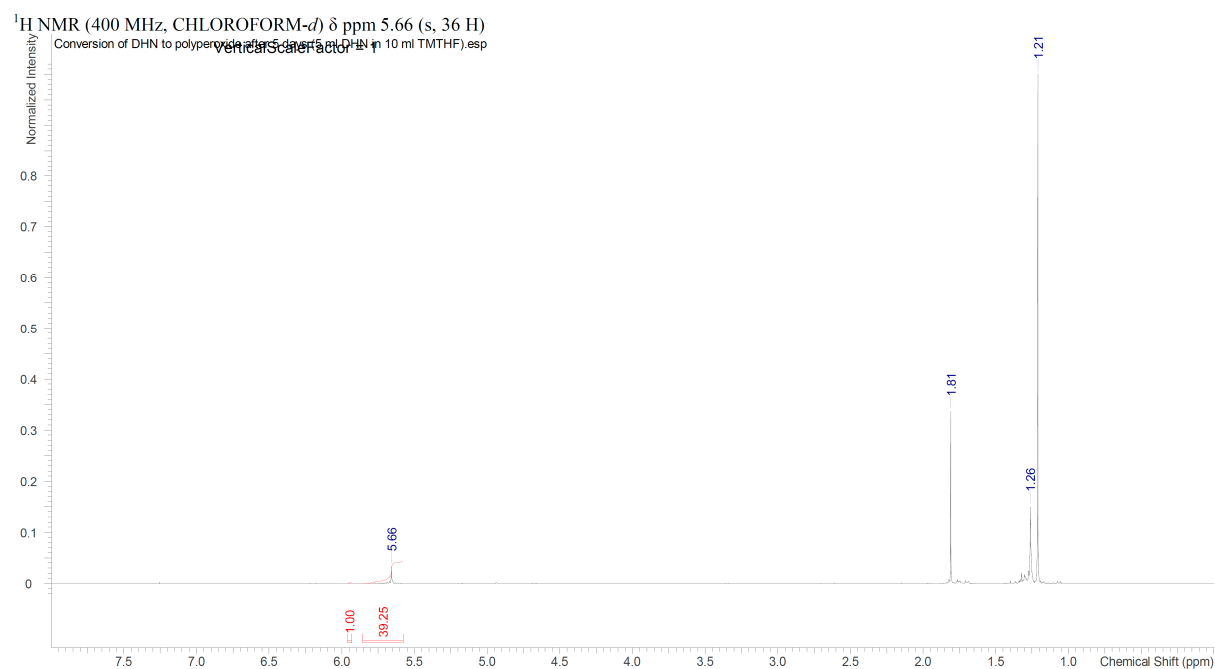

Figure S7. <sup>1</sup>H NMR spectrum of the polyperoxide of 2,5-dimethylhexane-2,4-diene (DHN polyperoxide). CDCl<sub>3</sub> solvent.

**RESULT:** 64 % Biobased Carbon Content (as a fraction of total organic carbon)

|                                            |                    |
|--------------------------------------------|--------------------|
| <b>Laboratory Number</b>                   | Beta-568423        |
| <b>Percent modern carbon (pMC)</b>         | 64.34 +/- 0.2 pMC  |
| <b>Atmospheric adjustment factor (REF)</b> | 100.0; = pMC/1.000 |

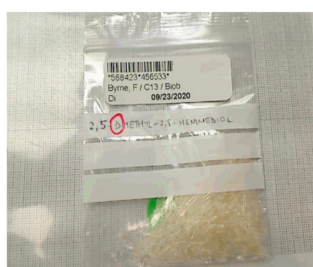

Package received - labeling COC

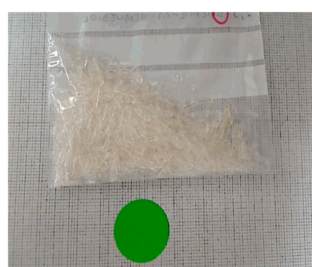

View of content (1mm x 1mm scale)

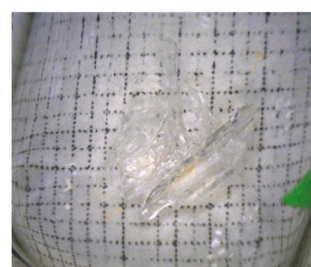

16.8mg analyzed (1mm x 1mm scale)

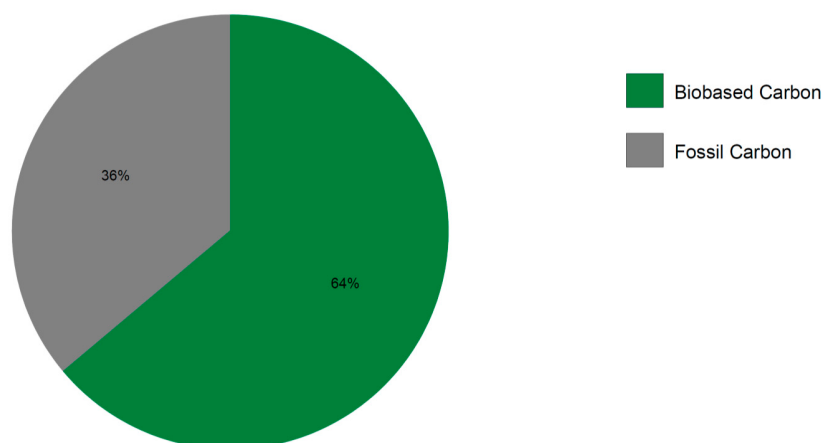

Figure S8. ASTM D6866-20 Method B for bio-based carbon testing results for 2,5-dimethyl-2,4-hexanediol.

**RESULT:** 64 % Biobased Carbon Content (as a fraction of total organic carbon)

|                                     |                    |
|-------------------------------------|--------------------|
| Laboratory Number                   | Beta-568422        |
| Percent modern carbon (pMC)         | 64.44 +/- 0.21 pMC |
| Atmospheric adjustment factor (REF) | 100.0; = pMC/1.000 |

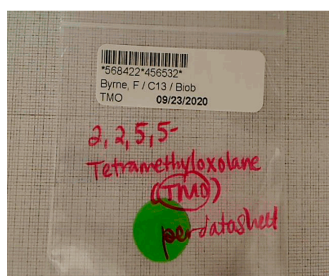

Package received - labeling COC

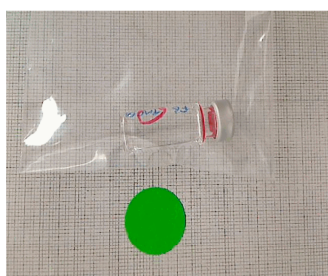

View of content (1mm x 1mm scale)

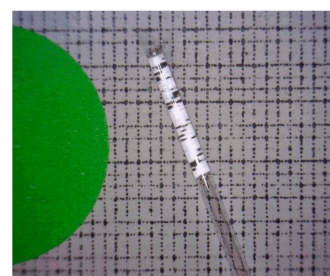

Representative sample analyzed (1mm x 1mm scale)

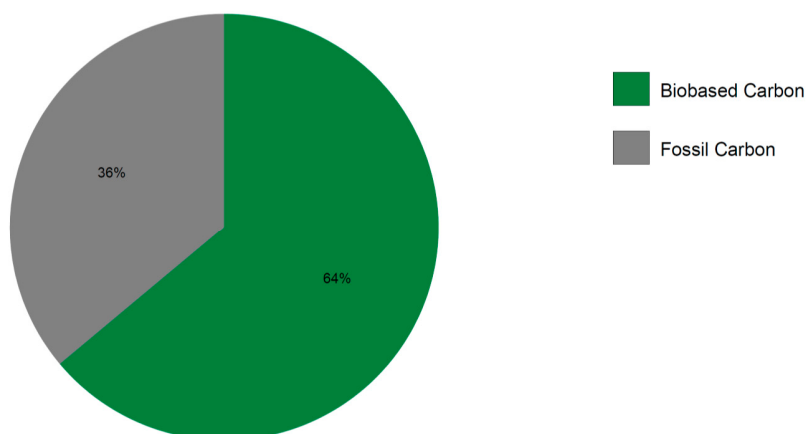

Figuer S9. ASTM D6866-20 Method B for bio-based carbon testing results for TMO.
